# Supplementary material for: IGF1 gene therapy in middle-aged female rats delays reproductive senescence through its effects on hypothalamic GnRH and kisspeptin neurons
Source: publisher site journal article supplement (doi:10.18632/aging.204360), 2022-11-01
Supplement: Supplementary file [file aging-v14i21-204360-supplementary-material-SD1.pdf]

SUPPLEMENTARY FIGURES

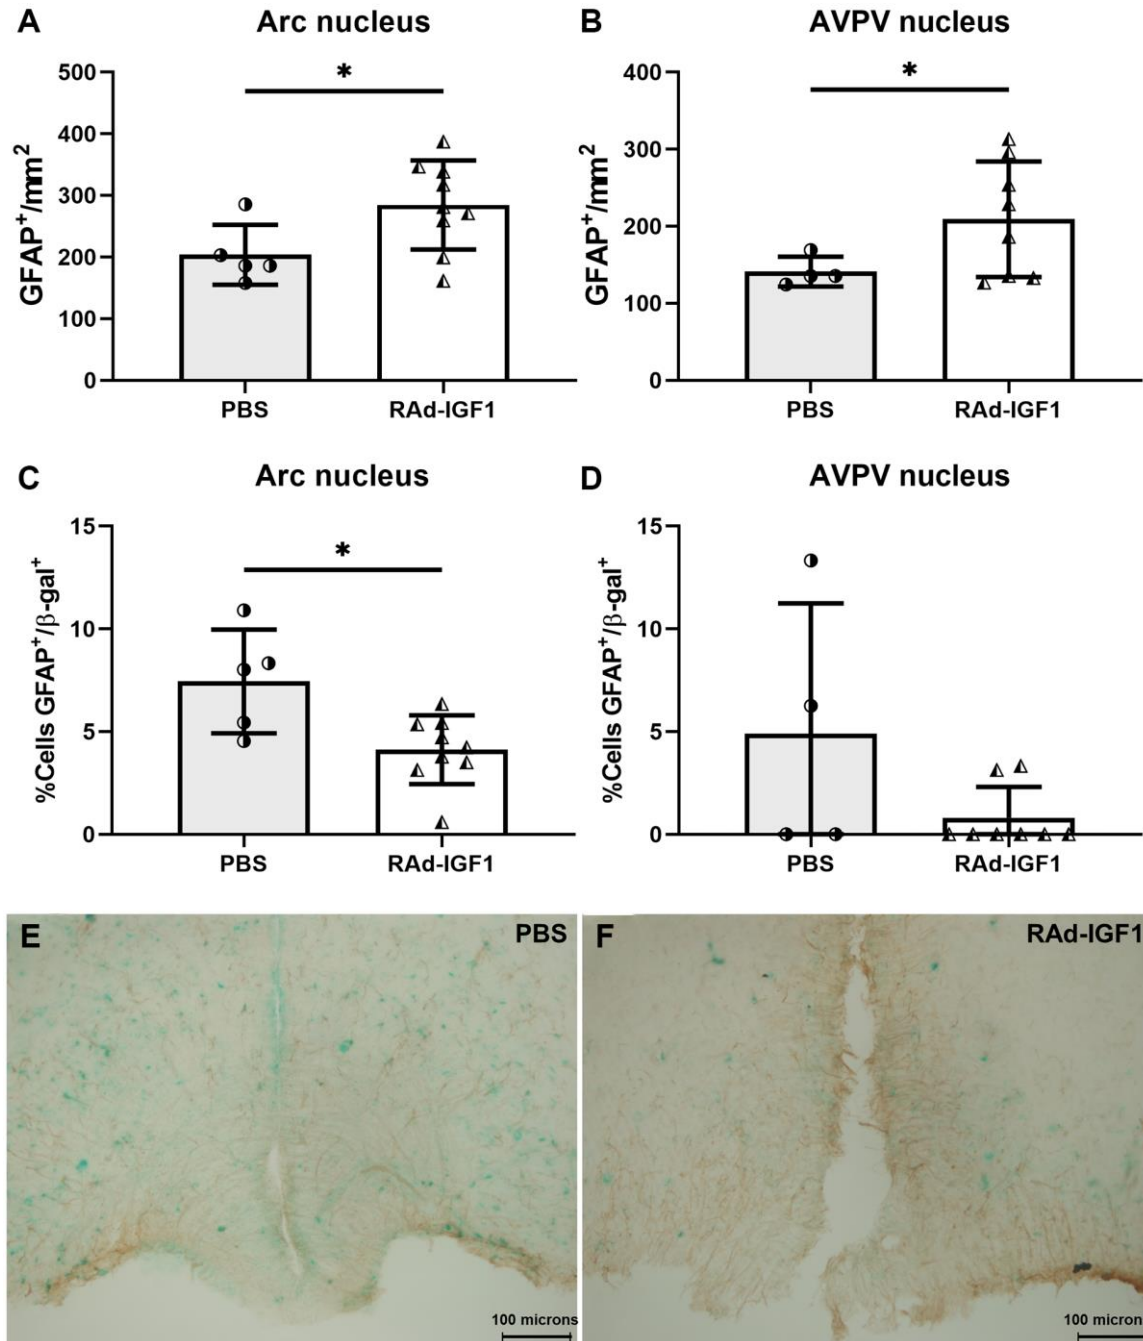

**Supplementary Figure 1. IGF1 gene therapy effect on the GFAP immunopositive cells.** (A and B) Quantification of GFAP immunopositive cells. (C and D) Percentage of astrocytes presenting dual-label for GFAP and SA-β-Gal (blue) staining. Error bars represent SD (Arcuate: N<sub>RAd-IGF1</sub> = 9; N<sub>PBS</sub> = 5. AVPV: N<sub>RAd-IGF1</sub> = 8; N<sub>PBS</sub> = 4). *t* test with Welch's correction was used. Asterisks indicate significant (*p* < 0.05) differences. (E and F) Representative example of GFAP/ SA-β-Gal double staining (Total magnification of 200×; scale bars: 100 microns).

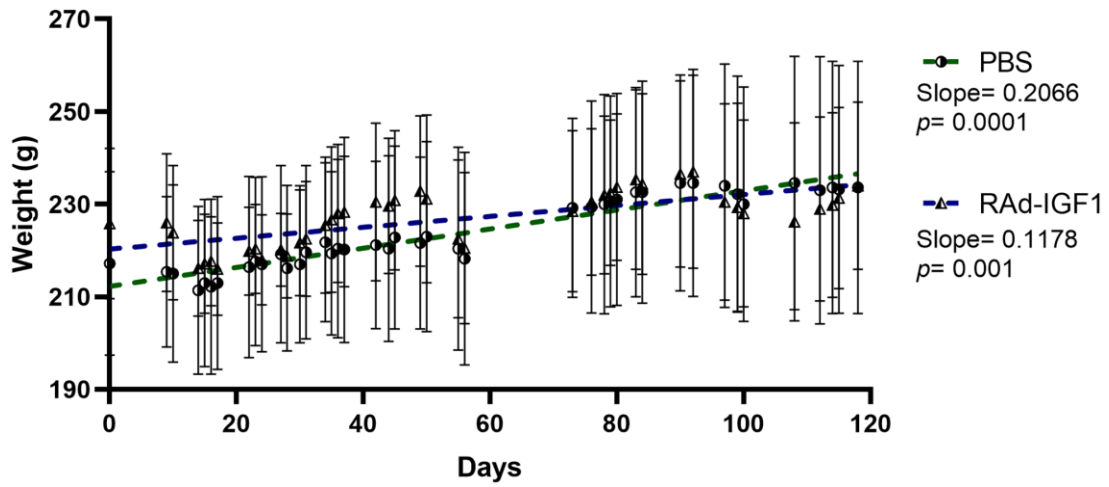

**Supplementary Figure 2. Body weight curve of both groups of rats.** Two-way ANOVA with repeated measures using the day and group as variable showed that during the 120 days experiment, differences in body weights between the control (PBS) and treatment (RAd-IGF1) groups were not significant. Error bars represent SD ( $N_{\text{RAd-IGF1}} = 13$ ;  $N_{\text{PBS}} = 9$ ).
